# Supplementary material for: Directional glycolysis of waste PET using deep eutectic solvents for preparation of aromatic-based polyurethane elastomers
Source: Royal Society of Chemistry journal article supplement (doi:10.1039/d4gc00292j), 2024-01-01
Supplement: d4gc00292j1.pdf [file d4gc00292j1.pdf]

## Supplementary Information

Directional glycolysis of waste PET by deep eutectic solvents for  
preparation of aromatic-based polyurethane elastomers

*Fei Li<sup>a,b</sup>, Xiaoqian Yao<sup>a</sup>, Rong Ding<sup>a,b</sup>, Yinan Bao<sup>a,c</sup>, Qing Zhou<sup>\*a,b</sup>, Dongxia Yan<sup>a</sup>, Yi Li<sup>a</sup>, Junli*

*Xu<sup>a</sup>, Jiayu Xin<sup>a,b</sup> and Xingmei Lu<sup>\*a,b</sup>*

<sup>a</sup> Beijing Key Laboratory of Ionic Liquids Clean Process, CAS Key Laboratory of Green Process and Engineering, State Key Laboratory of Mesoscience and Engineering, Institute of Process Engineering, Chinese Academy of Sciences, Beijing 100190, China. E-mail:

<sup>b</sup> School of Chemical and Engineering, University of Chinese Academy of Sciences, Beijing 100049, PR China.

<sup>c</sup> College of Chemical Engineering, Beijing Institute of Petrochemical Technology, Beijing 102617, China.

\*Corresponding author: Qing Zhou (Email: qzhou@ipe.ac.cn ), Xingmei Lu (Email:

xmlu@ipe.ac.cn )

## 1. Computational simulations of DES by density functional theory (DFT)

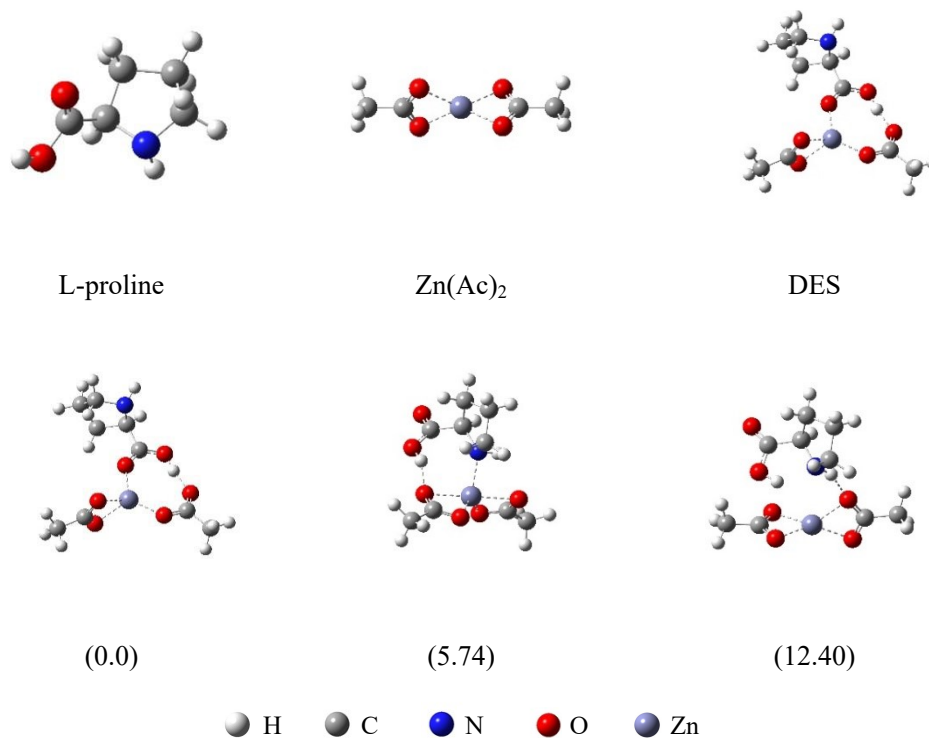

Figure S1. Optimized structures of Pro, Zn(Ac)<sub>2</sub> and DES with relative energies (kcal/mol).

## 2. TGA curve of DES

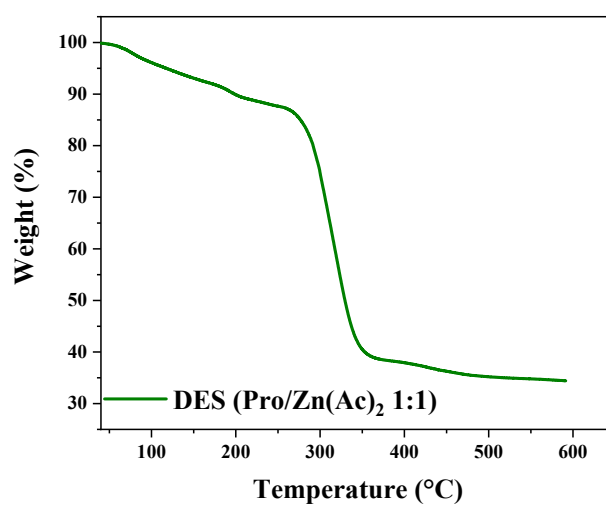

Figure S2. TGA curve of DES.

### 3. Characterization of PET and products

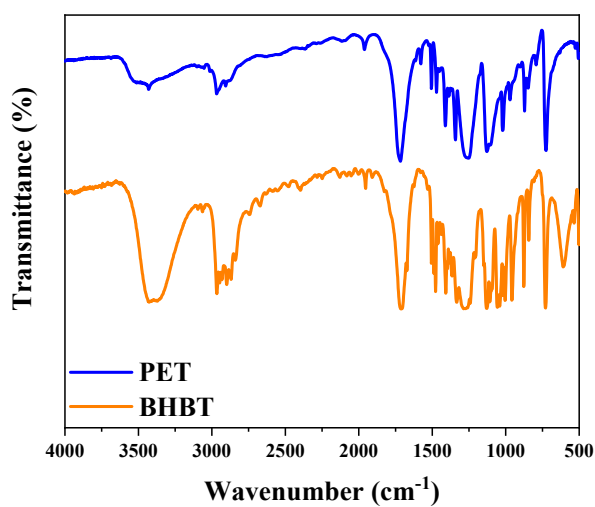

Figure S3. FT-IR spectra of raw PET and product.

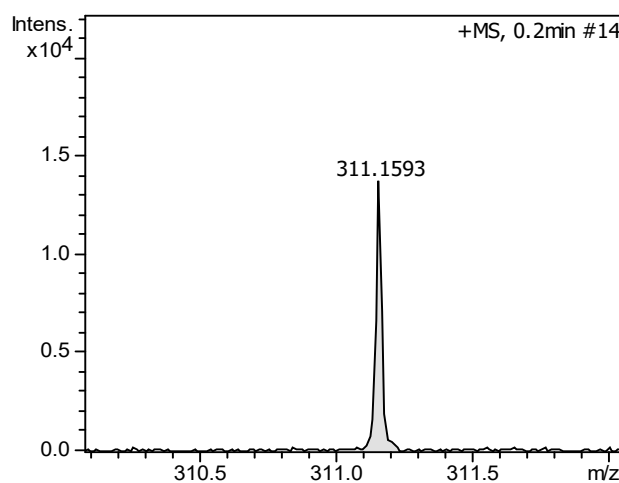

Figure S4. ESI-MS spectra of product glycolized by BDO.

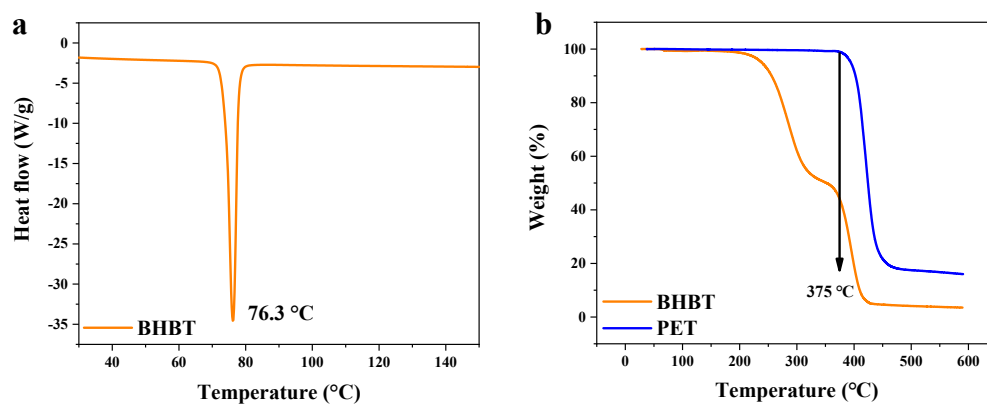

Figure S5. (a) DSC curve of product BHTB, (b) TGA curve of raw PET and product BHTB.

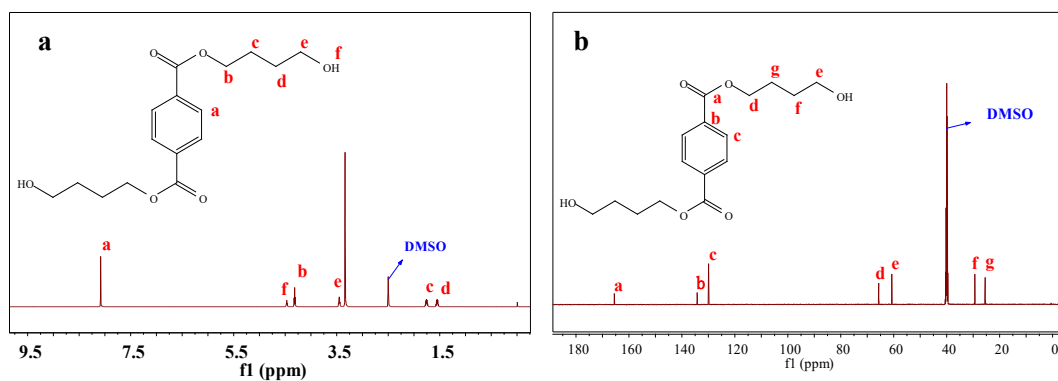

**Figure S6.** (a) the <sup>1</sup>H NMR spectra and (b) <sup>13</sup>C NMR spectra of purified product.

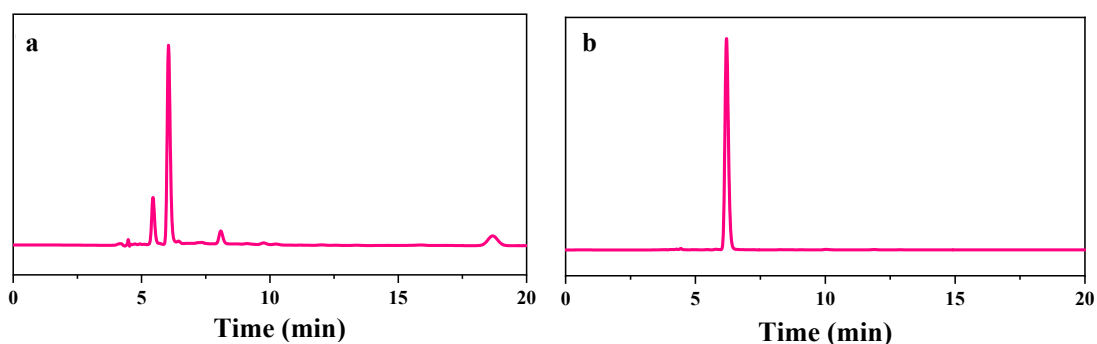

**Figure S7.** HPLC spectrum of product glycolized by BDO (a) before purification and (b) after purification.

### 3. Optimization of glycolysis reaction parameters

**Table S1.** Impact of reaction temperature on PET glycolysis

| Entry | Reaction temperature (°C) | Conv. of PET (%) | Yield of BHET (%) |
|-------|---------------------------|------------------|-------------------|
| 1     | 170                       | 17.59            | 14.98             |
| 2     | 180                       | 31.34            | 25.82             |
| 3     | 190                       | 48.40            | 34.99             |
| 4     | 200                       | 94.86            | 62.89             |
| 5     | 210                       | 100.00           | 65.40             |
| 6     | 220                       | 100.00           | 62.56             |

Reaction conditions: PET 5.0 g, BDO 25.0 g, Cat. 0.10 g, 30min

**Table S2.** Impact of reaction time on PET glycolysis

| Entry | Reaction time (min) | Conv. of PET (%) | Yield of BHET (%) |
|-------|---------------------|------------------|-------------------|
| 1     | 5                   | 16.24            | 12.06             |
| 2     | 10                  | 98.10            | 57.12             |
| 3     | 15                  | 100.00           | 67.11             |
| 4     | 20                  | 100.00           | 66.36             |
| 5     | 25                  | 100.00           | 66.26             |
| 6     | 30                  | 100.00           | 65.55             |
| 7     | 60                  | 100.00           | 62.13             |

Reaction conditions: PET 5.0 g, BDO 25.0 g, Cat. 0.10 g, 210°C

**Table S3.** Impact of catalyst ratio on PET glycolysis

| Entry | Catalyst ratio (%) | Conv. of PET (%) | Yield of BHET (%) |
|-------|--------------------|------------------|-------------------|
| 1     | 0                  | 0.14             | 0.02              |
| 2     | 0.5                | 97.61            | 55.46             |
| 3     | 1                  | 100.00           | 61.64             |
| 4     | 1.5                | 100.00           | 64.30             |
| 5     | 2                  | 100.00           | 67.11             |
| 6     | 2.5                | 100.00           | 66.65             |
| 7     | 3                  | 100.00           | 64.84             |
| 8     | 3.5                | 100.00           | 64.61             |
| 9     | 4                  | 100.00           | 64.52             |

Reaction conditions: PET 5.0 g, BDO 25.0 g, 210°C, 15 min

**Table S4.** Impact of BDO amount on PET glycolysis

| Entry | BDO amount (g) | Conv. of PET (%) | Yield of BHET (%) |
|-------|----------------|------------------|-------------------|
| 1     | 10             | 92.79            | 45.57             |
| 2     | 15             | 95.54            | 55.49             |
| 3     | 20             | 99.67            | 61.14             |
| 4     | 25             | 100.00           | 67.13             |
| 5     | 30             | 100.00           | 67.23             |

Reaction conditions: PET 5.0 g, Cat. 0.10 g, 210°C, 15 min

**Table S5.** The Influence of catalyst and single components on the glycolysis of PET

| Entry | Catalysts               | Conv. of PET (%) | Yield of BHET (%) |
|-------|-------------------------|------------------|-------------------|
| 1     | Pro                     | 14.3             | 2.03              |
| 2     | Zn(Ac) <sub>2</sub>     | 98.41            | 54.94             |
| 3     | Pro/Zn(Ac) <sub>2</sub> | 100              | 66.36             |

Reaction conditions: PET 1.0 g, BDO 5.0 g, Cat. 0.02 g, 210°C, 20min

#### 4. Reaction Kinetics

**Table S6.** Linear regressive result of kinetic data on PET glycolysis temperature

| Temperature (°C) | Rate constant | Adj. R-Square |
|------------------|---------------|---------------|
| 170              | 0.00255       | 0.9968        |
| 180              | 0.00784       | 0.9931        |
| 190              | 0.02161       | 0.9934        |
| 200              | 0.05590       | 0.9977        |
| 210              | 0.11273       | 0.9992        |

Reaction conditions: PET 1.0 g, BDO 5.0 g, Cat. 0.02 g, 210°C, 20min

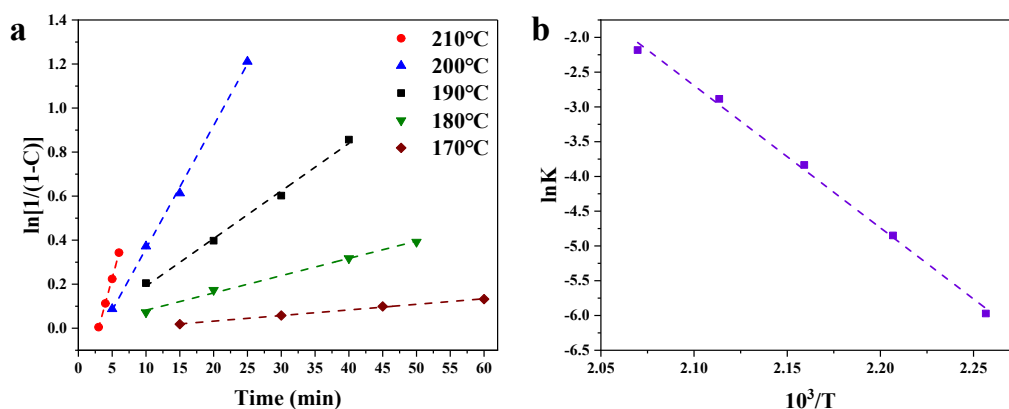

**Figure S8.** Kinetics of PET glycolysis on (a) temperature and (b) activation energy.

Reaction conditions: PET 5.0 g, BDO 25.0 g, Cat. (Pro/Zn(Ac)<sub>2</sub>, 0.10 g)

## 5. Calculation of quantitative metrics

The reaction equation for the PET glycolysis from 1,4-butanediol is shown as Fig. S9.

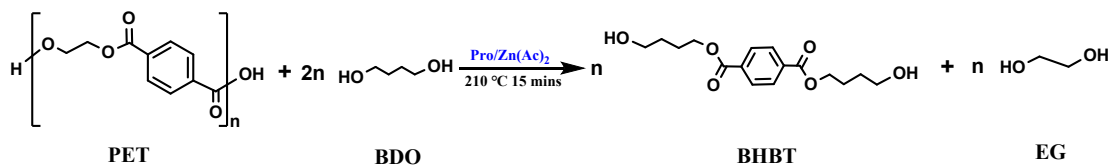

**Figure S9.** The reaction equation for the PET glycolysis from 1,4-butanediol.

Some quantitative typical metrics applied at First and Second Pass, such as Selectivity, atom economy (AE), reaction mass efficiency (RME), optimum efficiency (OE) and the total process mass intensity (PMI), were calculated according to the formula given in CHEM21 Metrics Toolkit, the calculation process is shown below:

$$(1) \text{ Percentage selectivity} = \frac{\% \text{yield}}{\% \text{conversion}} \times 100 = \frac{67.1\%}{100\%} \times 100 = 67.1\%$$

(2) AE

$$= \frac{\text{molecular weight of product}}{\text{total molecular weight of reactants}} \times 100 = \frac{M_{BHBT}}{M_{PET} + 2M_{BDO}} \times 100 = 83.3\%$$

(3) RME

$$= \frac{\text{mass of isolated product}}{\text{total mass of reactants}} \times 100 = \frac{m_{BHBT}}{m_{PET} + m_{reacted BDO}} \times 100 = 25.0\%$$

$$(4) OE = \frac{RME}{AE} \times 100 = \frac{25.0\%}{83.3\%} \times 100 = 30.0\%$$

$$(5) PMI = \frac{\text{total mass in a process}}{\text{mass of product}} = \frac{m_{PET} + m_{\text{total BDO}} + m_{Cat.}}{m_{BHBT}} = \frac{5 + 25 + 0.1}{5.2855} = 5.7$$

Where  $m_{PET}$  is the initial weight of PET;  $m_{\text{total BDO}}$  is the total mass of BDO as reactant and solvent;  $m_{BHBT}$  is the weight of BHBT, which are calculated by HPLC according to the peak area of BHBT. And  $M_{PET} = 192 \text{ g}\cdot\text{mol}^{-1}$  (the molar mass of PET repeating unit),  $M_{BDO} = 90.07 \text{ g}\cdot\text{mol}^{-1}$ ,  $M_{BHBT} = 310.14 \text{ g}\cdot\text{mol}^{-1}$ ,  $M_{EG} = 48.02 \text{ g}\cdot\text{mol}^{-1}$ .

## 56. DFT calculation

**Computation details:** The density functional theory (DFT) calculations were carried out to analysis the coordination and interaction. All calculations were carried out using the Gaussian 09 program. The B3LYP/6-311++G(d,p) method has been used for structure optimizations, and subsequent frequency calculations at the same level verify the optimized structures to be ground states without imaginary frequencies (NImag = 0).

### Cartesian coordinates for the optimized structures in Fig. 7

#### ***BDO***

|   |             |             |             |
|---|-------------|-------------|-------------|
| C | 0.00000000  | 0.00000000  | 0.00000000  |
| H | 0.00000000  | 0.00000000  | 1.09910000  |
| H | 1.04620000  | 0.00000000  | -0.33670000 |
| C | -0.71190000 | -1.23910000 | -0.51870000 |
| H | -1.75700000 | -1.19900000 | -0.19200000 |
| H | -0.72130000 | -1.19880000 | -1.61370000 |
| C | -0.05430000 | -2.53810000 | -0.03990000 |
| H | -0.04480000 | -2.57830000 | 1.05510000  |
| H | 0.99080000  | -2.57820000 | -0.36660000 |
| C | -0.76620000 | -3.77710000 | -0.55860000 |
| H | -0.76650000 | -3.77700000 | -1.65770000 |
| H | -1.81230000 | -3.77730000 | -0.22160000 |
| O | -0.07750000 | -4.92650000 | -0.05730000 |
| H | -0.51900000 | -5.71850000 | -0.37770000 |
| O | -0.68840000 | 1.14930000  | -0.50170000 |
| H | -0.24820000 | 1.94140000  | -0.17950000 |

#### ***BDO + Pro + Zn(Ac)<sub>2</sub>***

|    |            |             |            |
|----|------------|-------------|------------|
| Zn | 0.20780900 | -0.63748500 | 0.54868600 |
|----|------------|-------------|------------|



|   |             |             |             |
|---|-------------|-------------|-------------|
| C | 0.95646200  | -4.52590600 | -1.28307200 |
| H | 1.97424400  | -4.20186500 | -1.49092600 |
| H | 0.97089100  | -5.18249400 | -0.40760200 |
| H | 0.54360700  | -5.09195700 | -2.11772400 |
| C | 0.08938200  | -3.33946700 | -0.96514200 |
| O | -1.17996300 | -3.54046800 | -1.10503400 |
| O | 0.60650200  | -2.27298800 | -0.58720800 |
| C | 3.31112100  | -0.25890500 | 3.18668000  |
| H | 2.91203400  | 0.41725900  | 3.94624300  |
| H | 3.35925300  | -1.25431800 | 3.63432800  |
| H | 4.30846200  | 0.06219200  | 2.89167900  |
| C | 2.37692300  | -0.28953300 | 1.99847300  |
| O | 2.75198100  | 0.02006200  | 0.85431800  |
| O | 1.16230300  | -0.65628100 | 2.24075900  |
| C | -3.53134200 | 0.55470000  | -0.22793000 |
| C | -2.80077400 | 2.74736300  | 0.48055600  |
| C | -4.17965900 | 2.49498000  | 1.09536800  |
| C | -4.27074200 | 0.96065800  | 1.07003600  |
| H | -4.22665600 | 0.35538900  | -1.04395900 |
| H | -2.01546200 | 2.58316300  | 1.22327700  |
| H | -2.66923400 | 3.74870400  | 0.06591300  |
| H | -4.27691700 | 2.90639200  | 2.10230300  |
| H | -4.96126900 | 2.94282900  | 0.47205100  |
| H | -3.74683200 | 0.54181500  | 1.93154300  |
| H | -5.29661700 | 0.58952400  | 1.07938700  |
| N | -2.65776300 | 1.72894900  | -0.59723800 |
| H | -3.01508600 | 2.11873100  | -1.46341100 |
| C | -2.62794500 | -0.67163800 | -0.06898000 |
| O | -1.75859200 | -0.60726700 | 0.85924500  |
| O | -2.76364500 | -1.61387100 | -0.87777500 |
| H | -1.79321100 | -2.70736900 | -0.92773700 |
| C | 2.40934300  | 2.74804400  | -1.09478800 |
| H | 2.07630200  | 2.39024800  | -0.11763300 |
| C | 1.27957000  | 2.53258100  | -2.11274300 |
| H | 1.65277600  | 2.67036800  | -3.13656000 |
| H | 0.49613800  | 3.28618200  | -1.97184100 |
| C | 0.64291000  | 1.14683300  | -2.03406400 |
| H | 1.39184300  | 0.36031500  | -2.12987900 |
| H | 2.61634100  | 3.81693900  | -0.98502800 |
| C | 3.71035400  | 2.01691400  | -1.46031200 |
| H | 4.26619500  | 2.58837200  | -2.21027700 |
| H | 3.48246600  | 1.03884400  | -1.90664900 |
| O | 4.57681500  | 1.85226200  | -0.34998000 |
| H | 4.14911600  | 1.19740200  | 0.22793000  |

|   |             |            |             |
|---|-------------|------------|-------------|
| H | -0.09232100 | 1.00693400 | -2.83351600 |
| O | -0.01695200 | 0.92596300 | -0.76511100 |
| H | -0.95721600 | 1.27926800 | -0.77004200 |

***BDO + 2-pyrrolidone + Zn(Ac)<sub>2</sub>***

|    |             |             |             |
|----|-------------|-------------|-------------|
| Zn | 0.22438300  | 0.59289900  | -0.17666500 |
| C  | -0.13154100 | -1.90358700 | -3.57221800 |
| H  | -0.95412700 | -1.97955100 | -4.28067200 |
| H  | 0.77098900  | -1.55888300 | -4.08201400 |
| H  | 0.08688800  | -2.88863400 | -3.15136300 |
| C  | -0.48238300 | -0.94927400 | -2.45128000 |
| O  | 0.46082600  | -0.75379000 | -1.57855200 |
| O  | -1.59442100 | -0.41140800 | -2.39066400 |
| C  | 0.97786100  | 4.77451500  | -0.42255800 |
| H  | 0.89472800  | 4.87700400  | -1.50685700 |
| H  | 0.04167400  | 5.13772000  | 0.00873500  |
| H  | 1.81053600  | 5.36926500  | -0.05148800 |
| C  | 1.16041100  | 3.31433500  | -0.06377200 |
| O  | 2.14420400  | 2.96200500  | 0.61818400  |
| O  | 0.24683600  | 2.52248900  | -0.50705900 |
| C  | 2.67284400  | -2.42615200 | 1.79128300  |
| H  | 1.78786500  | -1.97492900 | 2.24996500  |
| C  | 3.65625500  | -1.33188500 | 1.34551800  |
| H  | 4.55442300  | -1.80288700 | 0.92391900  |
| H  | 3.98678900  | -0.76828300 | 2.22478200  |
| C  | 3.14006900  | -0.34242500 | 0.30957300  |
| H  | 2.82801000  | -0.84701400 | -0.60851300 |
| H  | 3.16718300  | -3.00558400 | 2.57956400  |
| C  | 2.20206600  | -3.40707000 | 0.70185800  |
| H  | 2.01246100  | -4.38115600 | 1.15896900  |
| H  | 2.99454200  | -3.55590700 | -0.04724600 |
| O  | 0.97179600  | -3.05842700 | 0.07372500  |
| H  | 1.07419600  | -2.30412900 | -0.52523300 |
| H  | 3.92902400  | 0.36595700  | 0.04077500  |
| O  | 2.01296800  | 0.41007400  | 0.81634400  |
| H  | 2.22477100  | 1.39786800  | 0.86013900  |
| C  | -4.53796600 | -0.45078500 | 0.12832900  |
| C  | -4.65830200 | -0.70813600 | 1.64849700  |
| C  | -3.39864400 | -0.04923300 | 2.24055100  |
| H  | -5.09504200 | 0.43848200  | -0.18544600 |
| H  | -4.87926600 | -1.29390000 | -0.47425200 |
| H  | -5.58607200 | -0.31047100 | 2.05975900  |
| H  | -4.64062000 | -1.78302800 | 1.84103100  |
| H  | -3.57528700 | 0.97834600  | 2.57579500  |

|   |             |             |             |
|---|-------------|-------------|-------------|
| H | -2.95264000 | -0.59162500 | 3.07428700  |
| N | -3.10289200 | -0.23560600 | -0.05794200 |
| H | -2.62697000 | -0.23083600 | -0.97409800 |
| C | -2.44055300 | 0.00413600  | 1.06732700  |
| O | -1.22046100 | 0.25753400  | 1.17506800  |

***BDO + NEP + Zn(Ac)<sub>2</sub>***

|    |             |             |             |
|----|-------------|-------------|-------------|
| Zn | 0.86459900  | -0.68748200 | 0.47762800  |
| C  | 0.46512700  | 2.36013200  | 2.99767200  |
| H  | -0.56770000 | 2.65106900  | 3.17932900  |
| H  | 0.93822700  | 2.06894300  | 3.93833100  |
| H  | 1.02933400  | 3.20769400  | 2.60154100  |
| C  | 0.54209200  | 1.20963600  | 2.02874200  |
| O  | 1.69399400  | 0.75985500  | 1.69592500  |
| O  | -0.49363800 | 0.68209900  | 1.54299400  |
| C  | 1.64272100  | -4.54947700 | 0.49021800  |
| H  | 2.46521200  | -4.80563300 | -0.17575200 |
| H  | 1.92368100  | -4.82257200 | 1.51161300  |
| H  | 0.74418700  | -5.10974500 | 0.23101500  |
| C  | 1.36847100  | -3.06882200 | 0.45323500  |
| O  | 0.23582000  | -2.62687800 | 0.84034600  |
| O  | 2.25709400  | -2.25653900 | 0.06574800  |
| C  | 2.48743500  | 2.19387600  | -1.42202800 |
| H  | 1.67734500  | 2.18930300  | -0.68757300 |
| C  | 2.01009200  | 1.47447600  | -2.69249300 |
| H  | 2.81127400  | 1.44379100  | -3.44240200 |
| H  | 1.19360200  | 2.05053000  | -3.14107900 |
| C  | 1.53774100  | 0.03509200  | -2.48093900 |
| H  | 2.35044000  | -0.62472200 | -2.17717200 |
| H  | 2.68131400  | 3.24570700  | -1.65388000 |
| C  | 3.73946300  | 1.59854600  | -0.76672000 |
| H  | 4.62156100  | 1.81168500  | -1.37822800 |
| H  | 3.66193200  | 0.50626100  | -0.68878900 |
| O  | 3.99121700  | 2.16120900  | 0.51532000  |
| H  | 3.34408100  | 1.77513300  | 1.12525900  |
| H  | 1.10883100  | -0.36552900 | -3.40422300 |
| O  | 0.54271200  | -0.08154100 | -1.43633600 |
| H  | -0.31365400 | 0.36719900  | -1.66446100 |
| C  | -4.02679700 | 0.32516400  | 0.84461200  |
| C  | -4.36207600 | 1.81104500  | 0.61569500  |
| C  | -3.20037800 | 2.31406900  | -0.25452400 |
| H  | -4.91648900 | -0.30529200 | 0.89322300  |
| H  | -3.44001200 | 0.17118900  | 1.75752500  |
| H  | -5.30596100 | 1.89744800  | 0.07202400  |

|   |             |             |             |
|---|-------------|-------------|-------------|
| H | -4.46557500 | 2.35453600  | 1.55510500  |
| H | -3.48284400 | 3.04811300  | -1.00994000 |
| H | -2.38915500 | 2.74349400  | 0.34114400  |
| N | -3.20747100 | -0.02007000 | -0.32136300 |
| C | -2.65050900 | 1.05972900  | -0.90953100 |
| O | -1.80856500 | 1.04157900  | -1.81738400 |
| C | -2.80649400 | -1.39726200 | -0.60045900 |
| H | -2.32975600 | -1.81528900 | 0.29204300  |
| C | -3.97116500 | -2.27826200 | -1.05471200 |
| H | -4.74415200 | -2.36548300 | -0.28688200 |
| H | -4.43103500 | -1.88136100 | -1.96317100 |
| H | -3.60569600 | -3.28590500 | -1.26775500 |
| H | -2.04808500 | -1.35152100 | -1.38166700 |
